# Supplementary material for: New Genomic Regions Identified for Resistance to Spot Blotch and Terminal Heat Stress in an Interspecific Population of Triticum aestivum and T. spelta
Source: MDPI journal article supplement (doi:10.3390/plants11212987), 2022-11-05
Supplement: s1 [file s1]

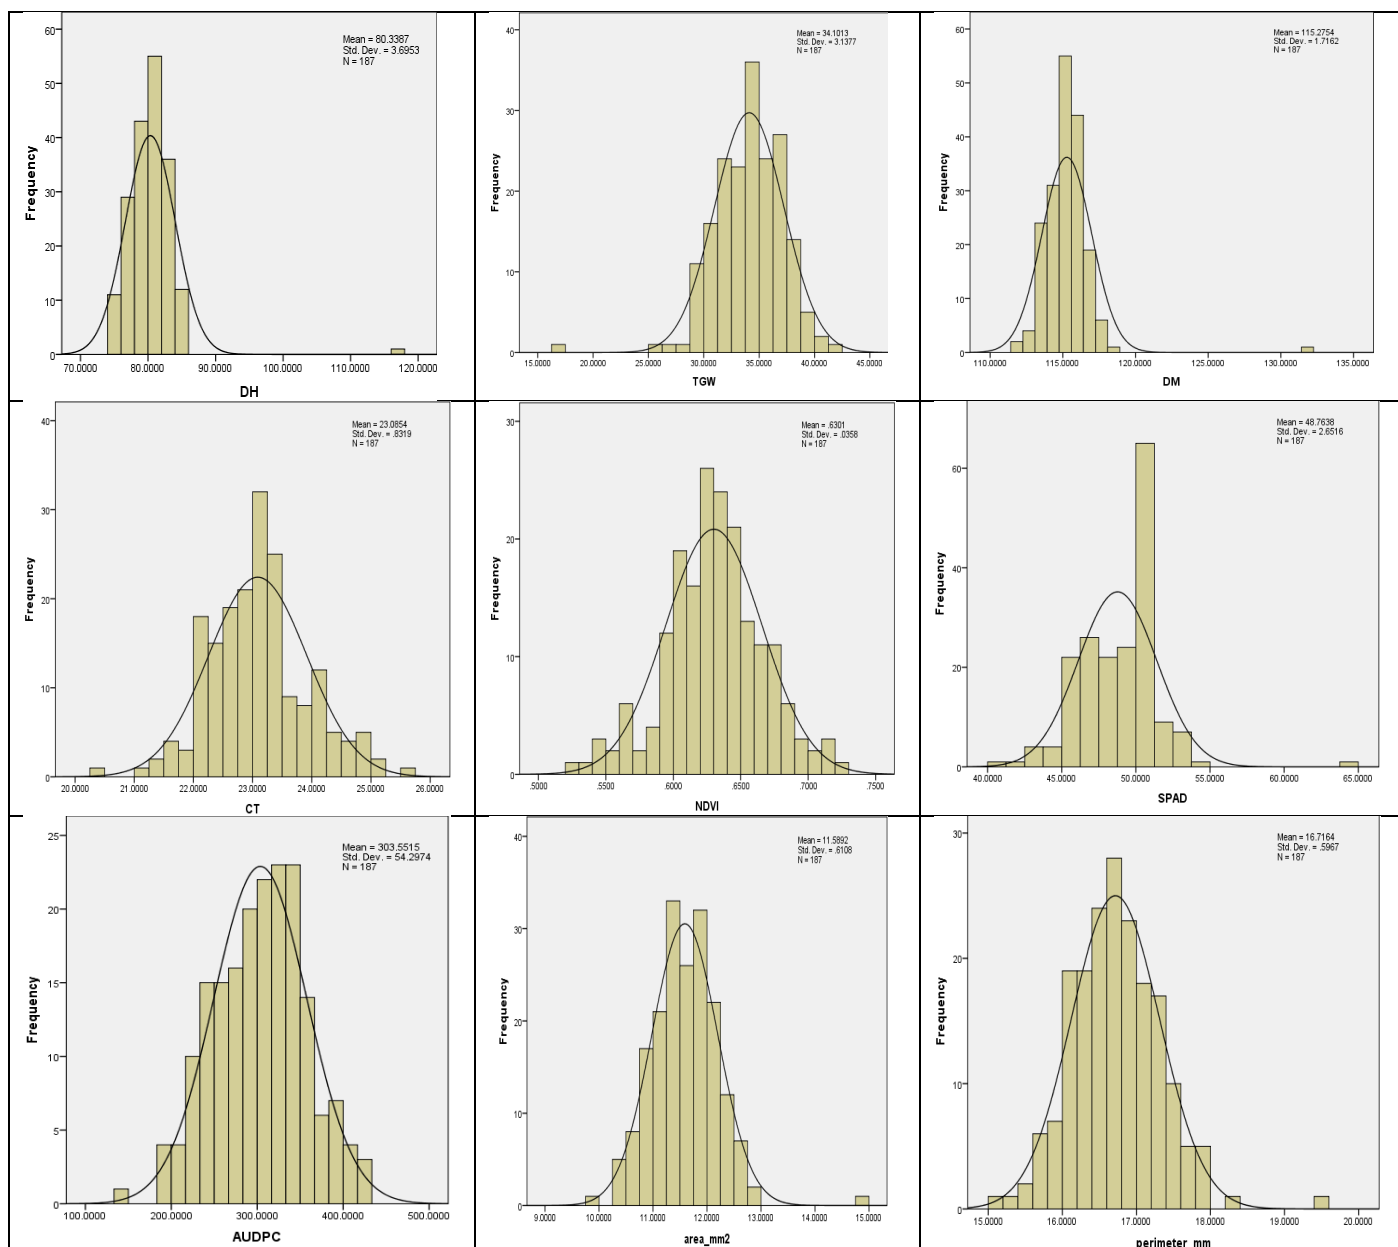

**Figure S1 Frequency distribution of various phenotypic traits among RILs along with its parents under control (without inoculation) condition.**

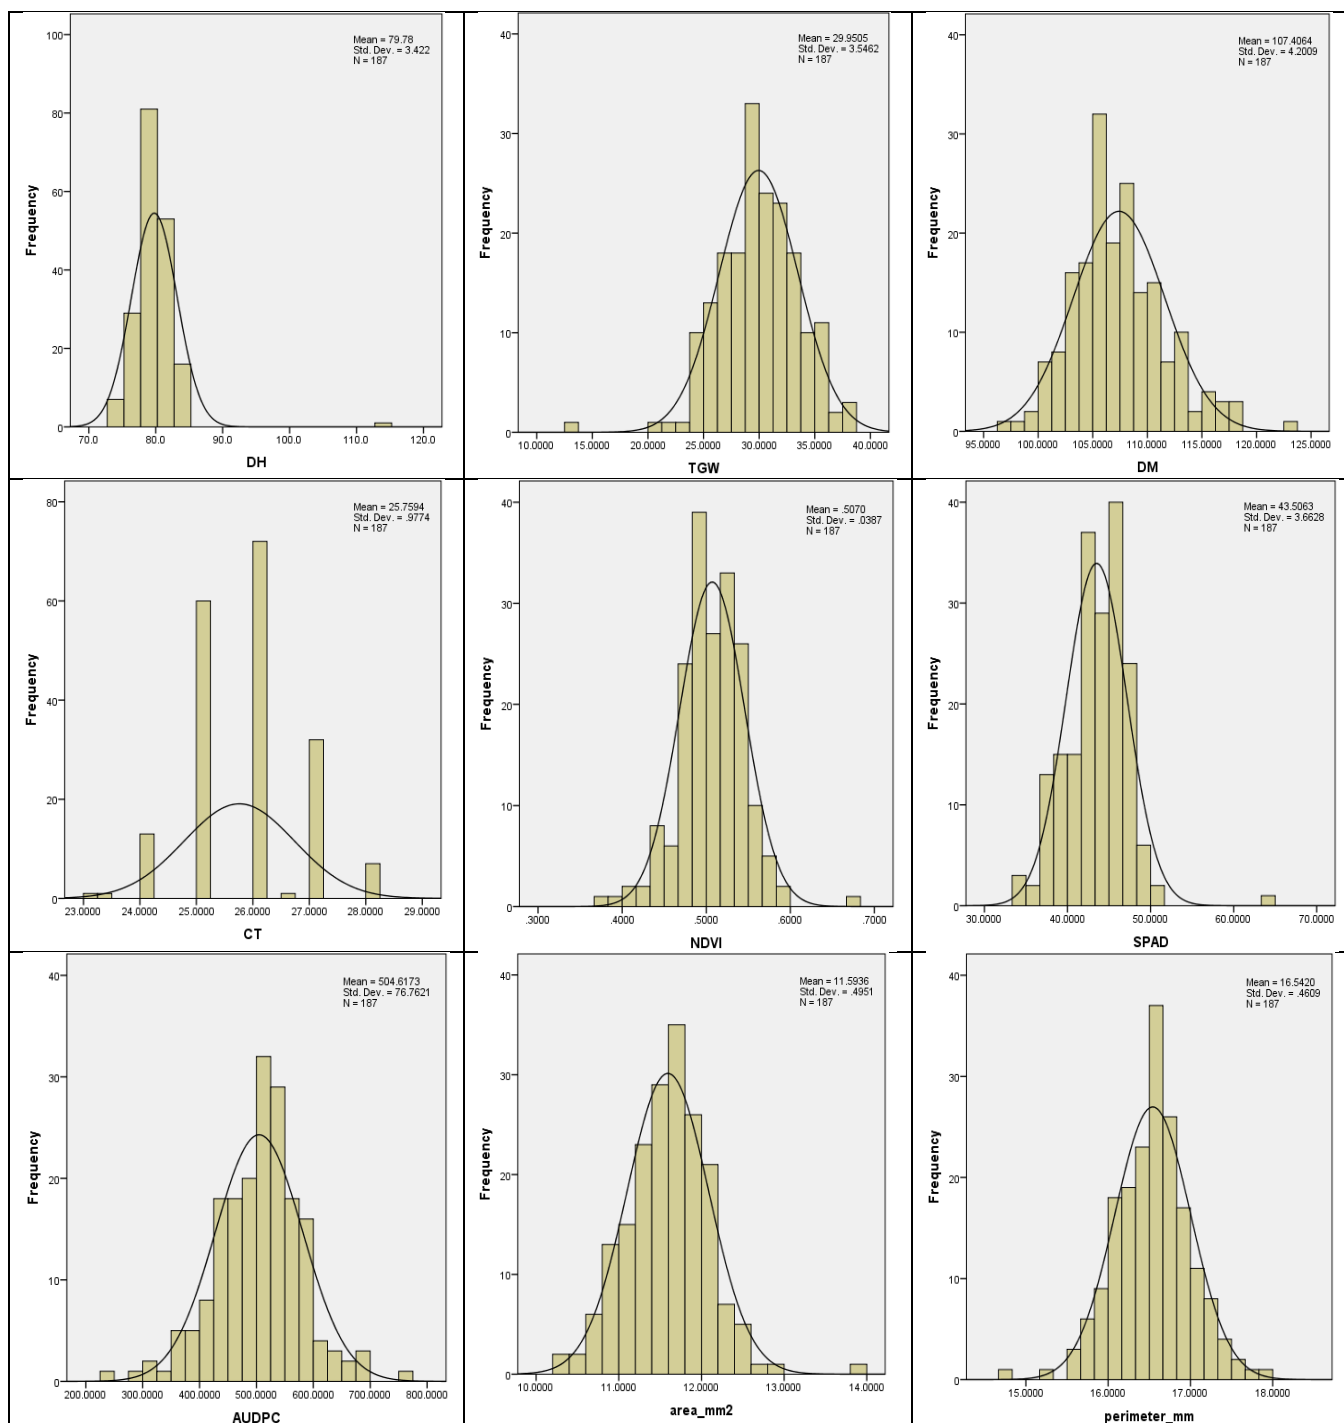

**Figure S2 Frequency distribution of various phenotypic traits among RILs along with its parents in response to spot blotch**

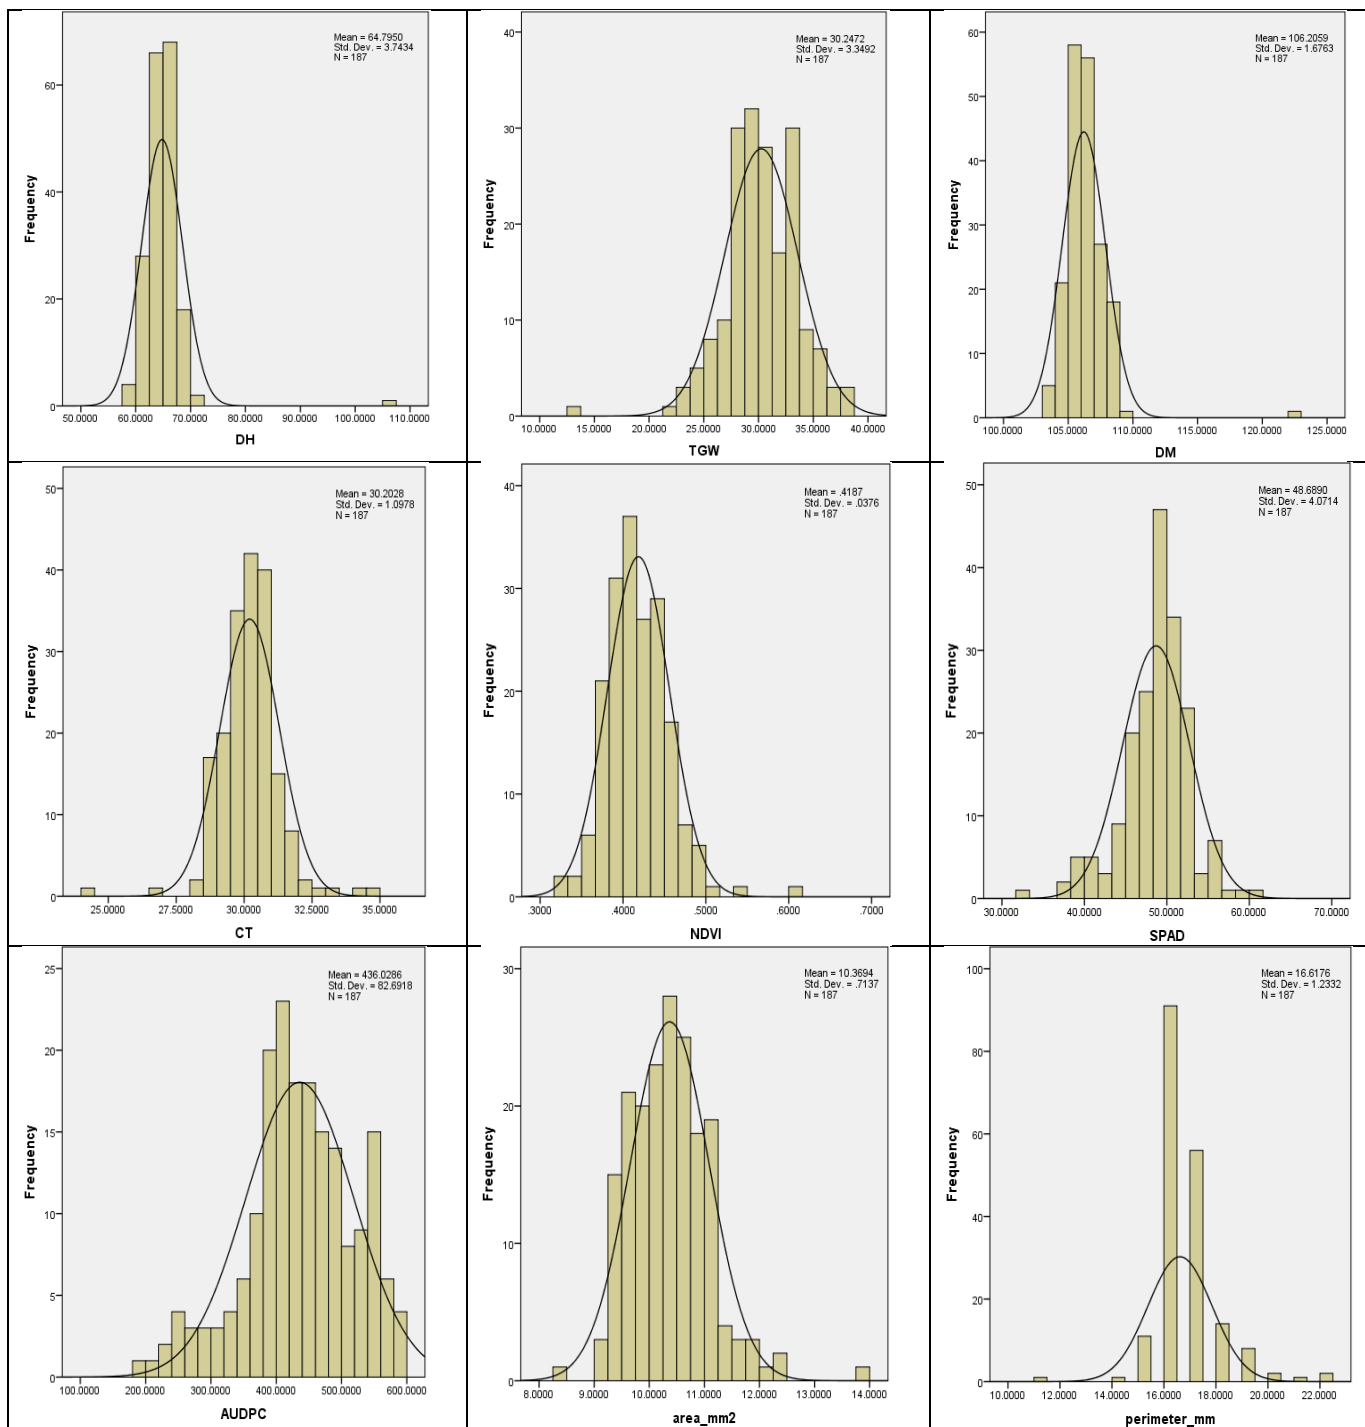

**Figure S3 Frequency distribution of various phenotypic traits among RILs along with its parents under terminal heat stress**

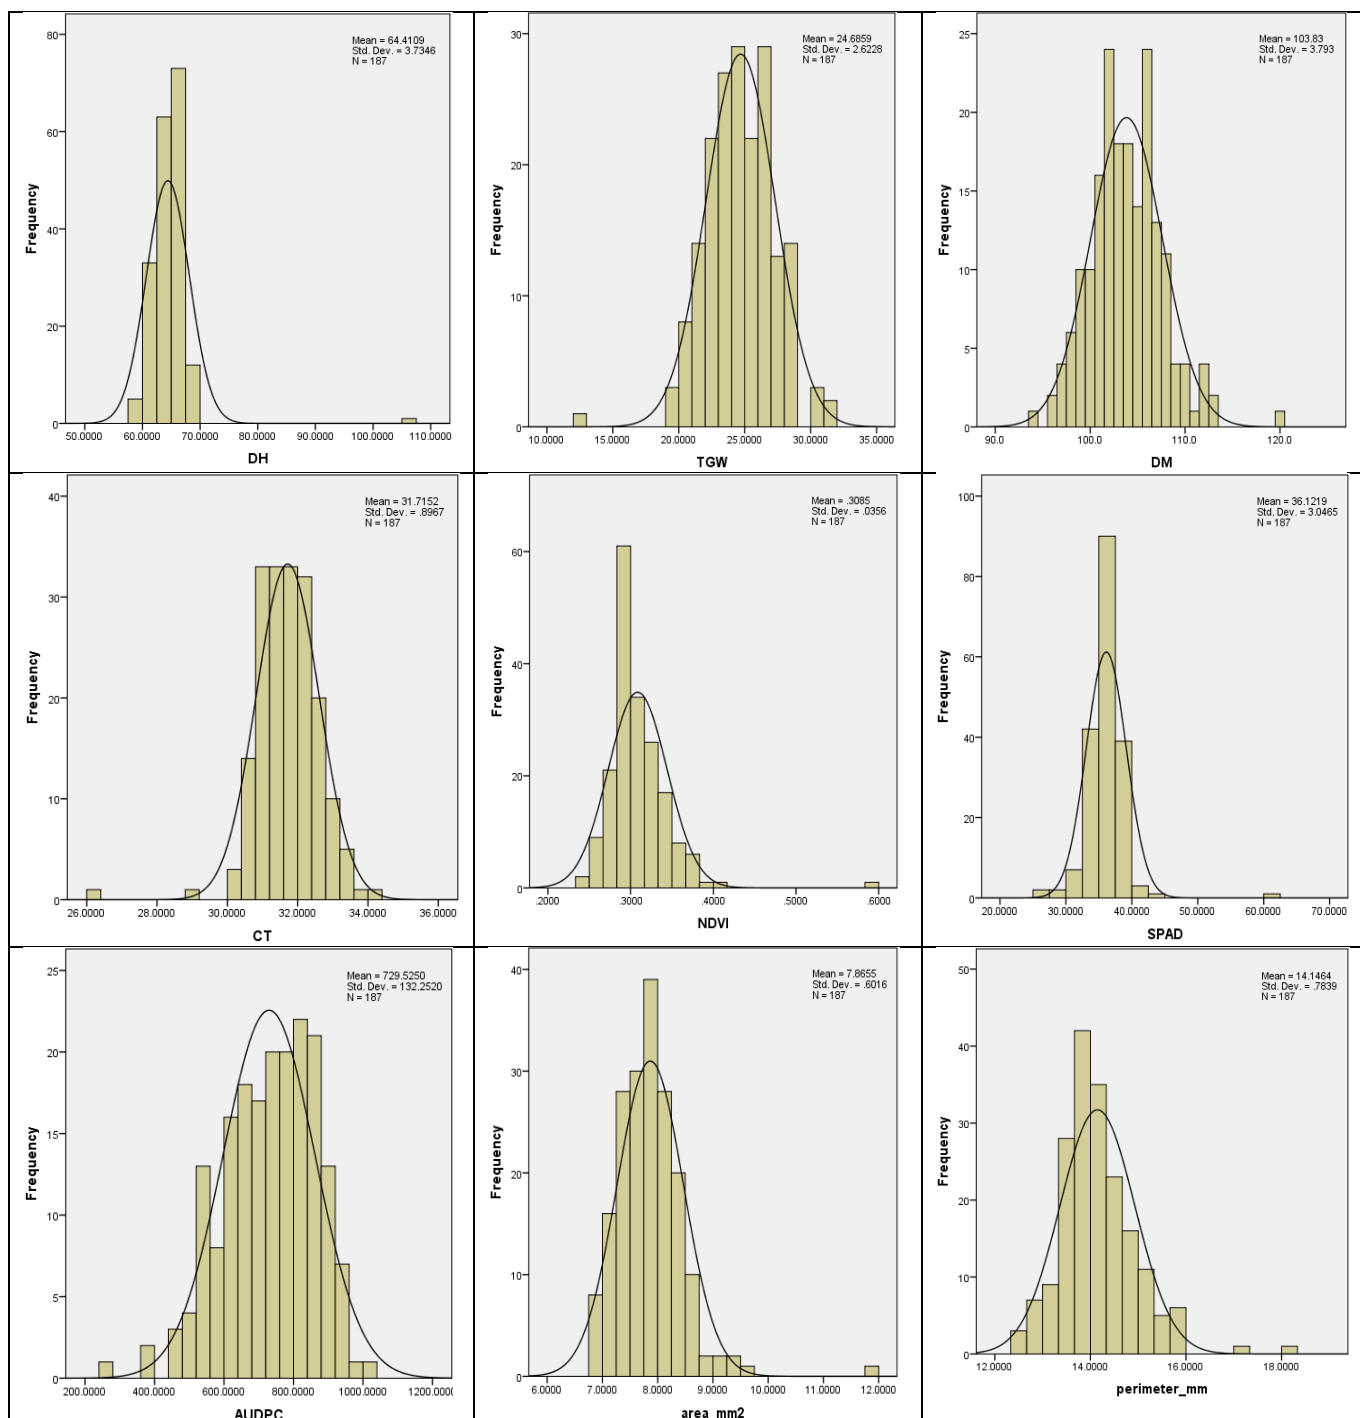

**Figure S4 Frequency distribution of various phenotypic traits among RILs along with its parents under combined stress of spot blotch and terminal heat stress.**

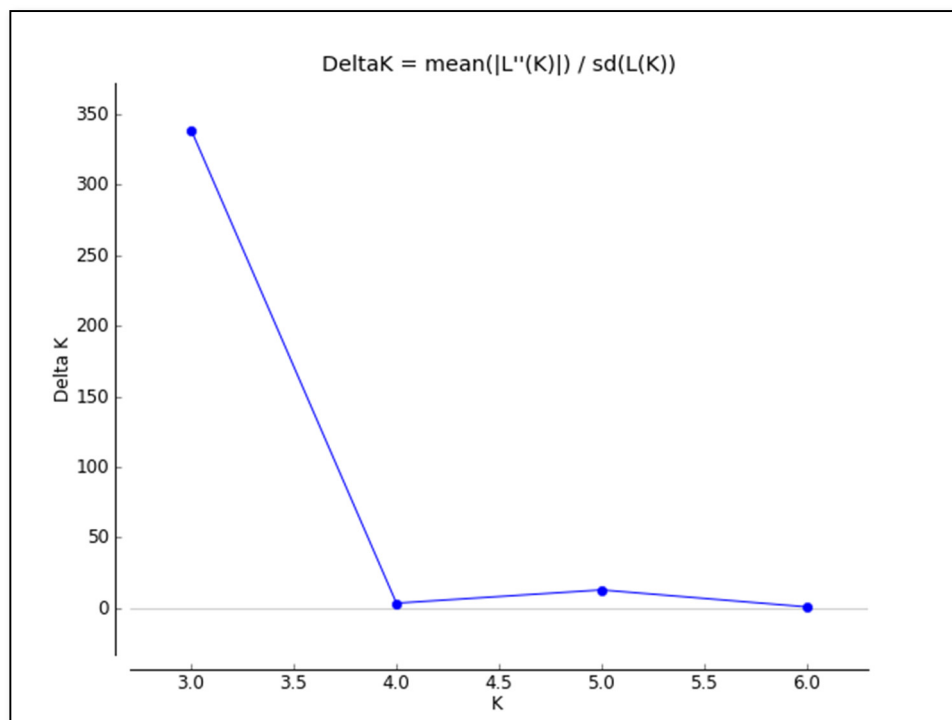

**Figure S5 The plot of K versus Delta K showing variations (The steep change in slope indicates K=3 as the best choice for the number of clusters)**

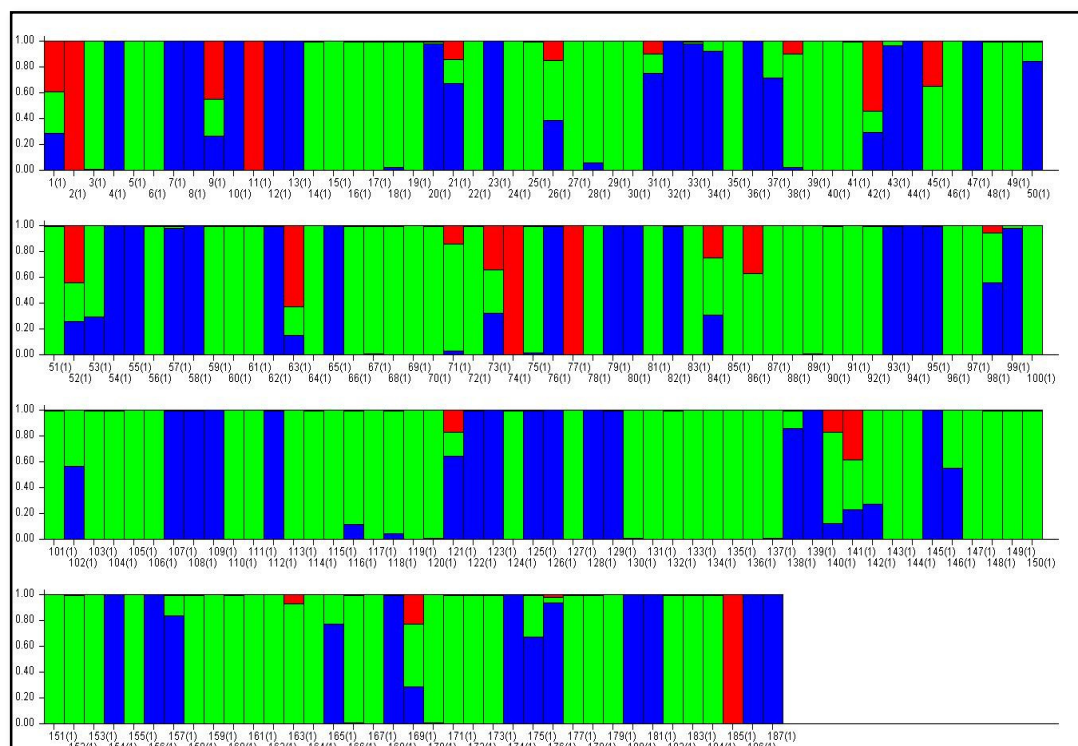

**Figure S6 The plot showing the population structure of different recombinant inbred lines (RILs) along with parents in clusters for k=3. (The numbers on the horizontal axis are the line numbers)**

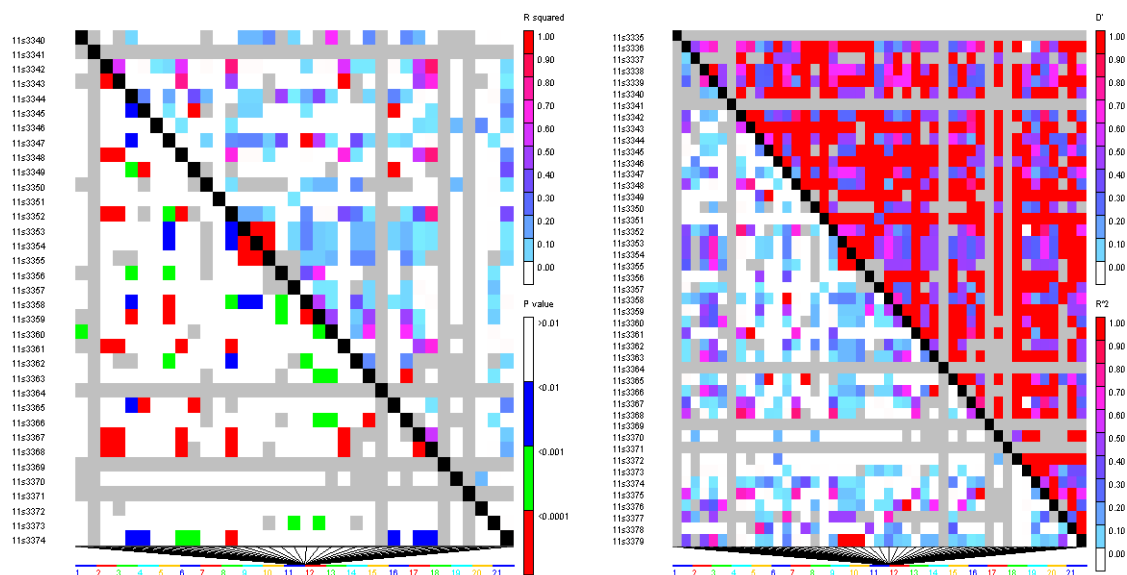

**Figure S7 Linkage disequilibrium (LD) plot based on Kinship matrix and SNP markers**

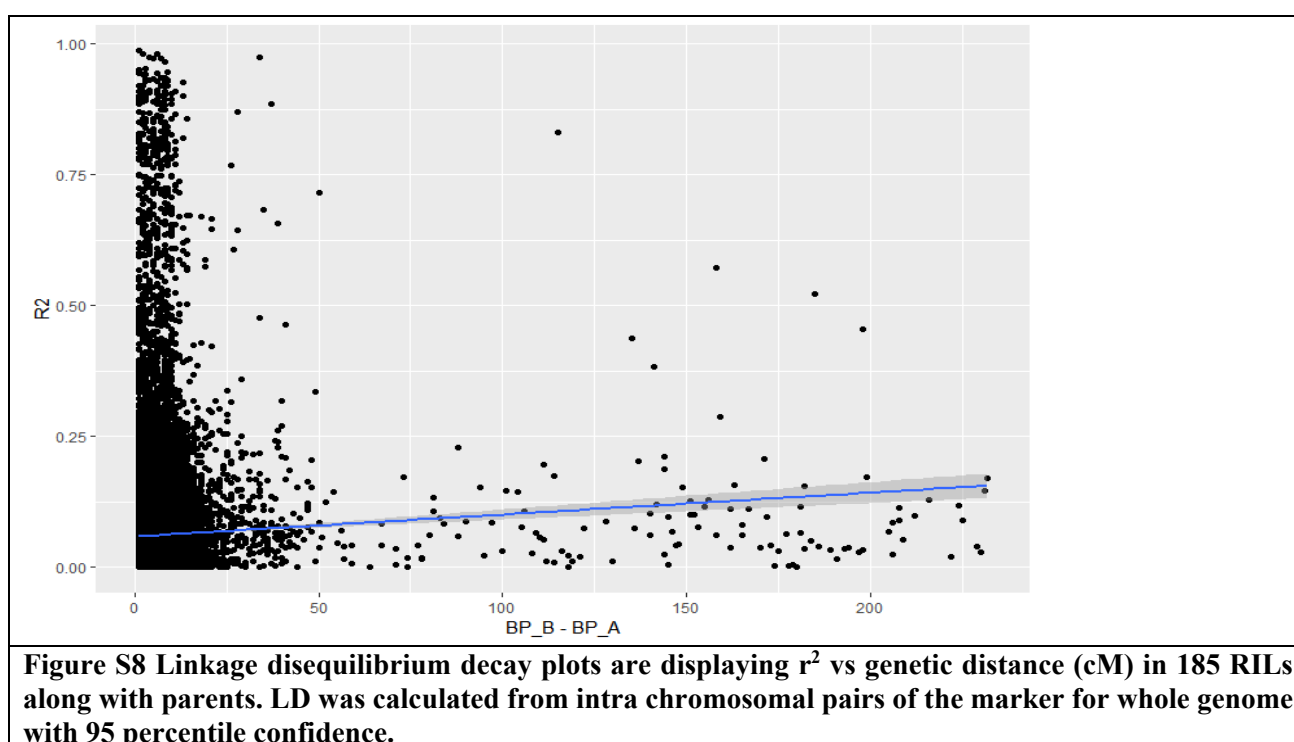

**Figure S8 Linkage disequilibrium decay plots are displaying  $r^2$  vs genetic distance (cM) in 185 RILs along with parents. LD was calculated from intra chromosomal pairs of the marker for whole genome with 95 percentile confidence.**

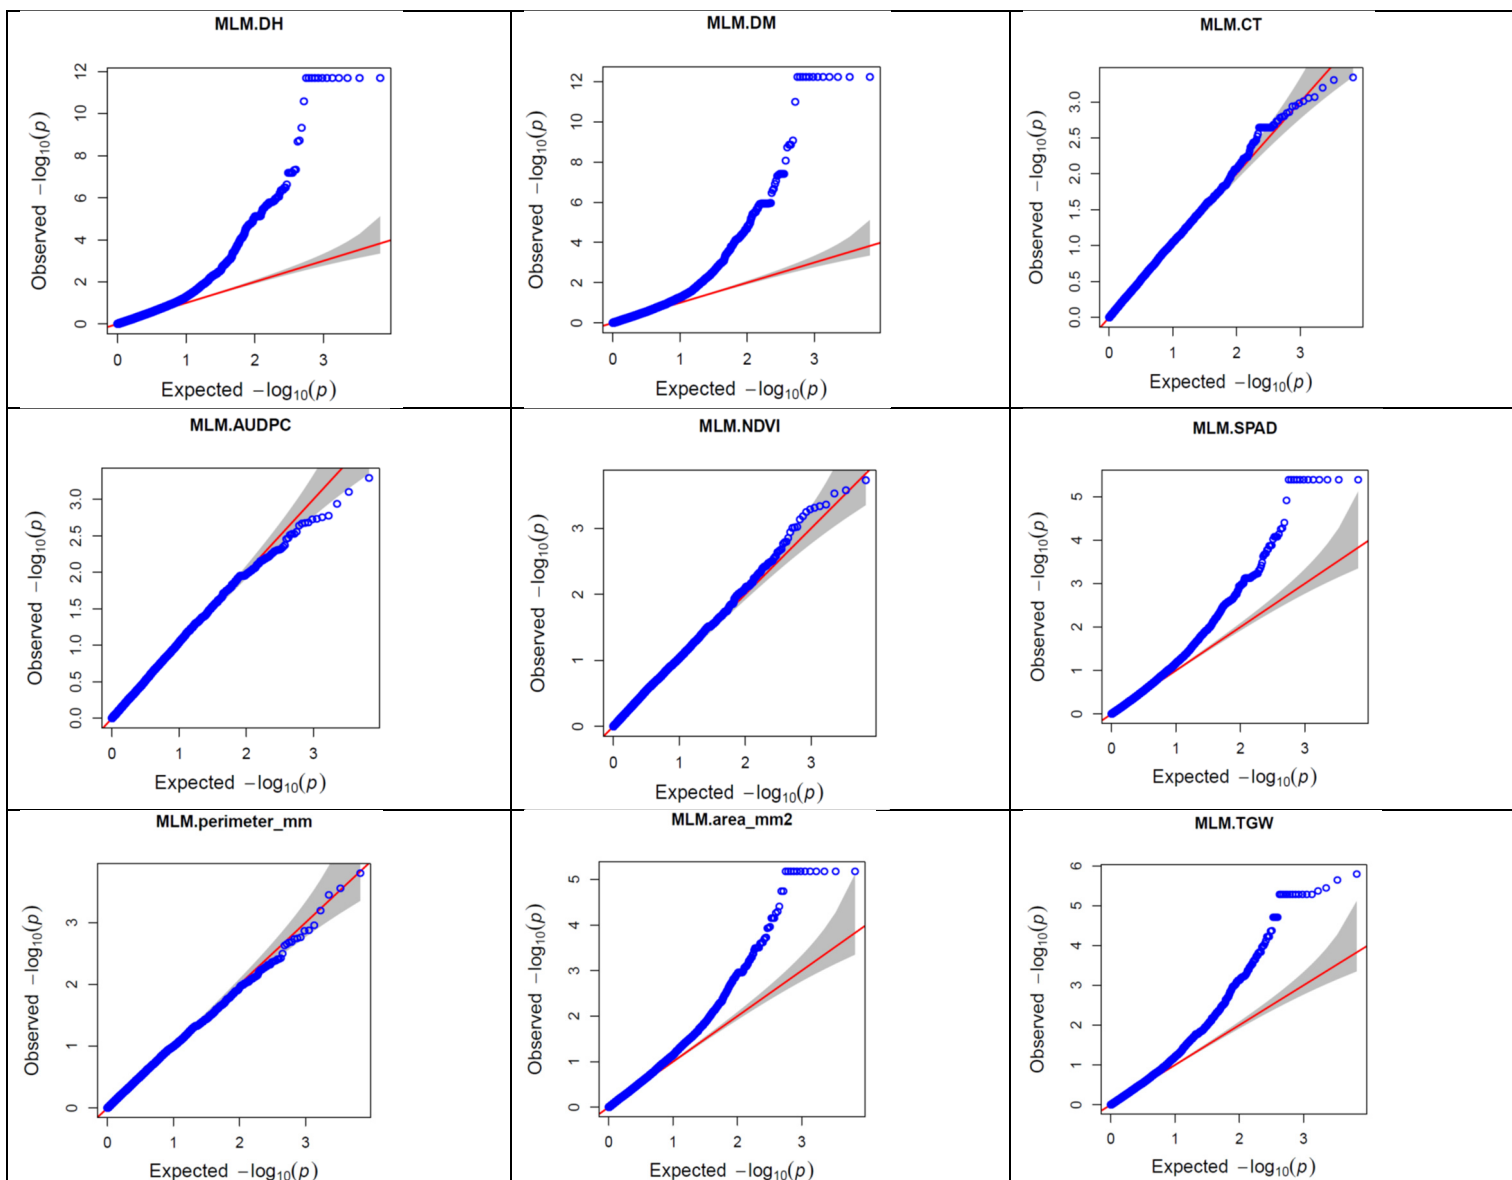

**Figure S9** Quantile–Quantile (Q-Q) plot showing the distribution of the recombinant inbred lines (RILs) analyzed in multiple linear models.
