# Supplementary material for: New Genomic Regions Identified for Resistance to Spot Blotch and Terminal Heat Stress in an Interspecific Population of Triticum aestivum and T. spelta
Source: MDPI journal article supplement (doi:10.3390/plants11212987), 2022-11-05
Supplement: s1 [file s1]

**Table S1: Mean performance for parent and recombinant inbred lines (RILs) across various environments and treatments**

| Trait     |        |               | Environment and Treatments            |                                            |                                                  |                                                          |
|-----------|--------|---------------|---------------------------------------|--------------------------------------------|--------------------------------------------------|----------------------------------------------------------|
|           |        |               | Control<br>(Timely sown<br>protected) | Spot Blotch<br>(Timely Sown<br>Inoculated) | Terminal Heat<br>stress (Late sown<br>protected) | Spot blotch + Terminal<br>Heat (Late sown<br>Inoculated) |
| DH (days) | HUW234 | Mean $\pm$ SD | 74.5 $\pm$ 1                          | 75.5 $\pm$ 1.5                             | 59 $\pm$ 2.8                                     | 60.5 $\pm$ 2                                             |
|           | H+26   | Mean $\pm$ SD | 116 $\pm$ 1.8                         | 114 $\pm$ 2                                | 105 $\pm$ 2.3                                    | 105 $\pm$ 1.8                                            |
|           | RIL    | Mean $\pm$ SD | 80.18 $\pm$ 2.58                      | 79.64 $\pm$ 2.26                           | 64.61 $\pm$ 2.27                                 | 64.21 $\pm$ 2.24                                         |
|           |        | Range         | 74.17 - 85.83                         | 74.5 - 85                                  | 58 - 72                                          | 58 - 69                                                  |
| TGW (g)   | HUW234 | Mean $\pm$ SD | 39.59 $\pm$ 1.6                       | 29.415 $\pm$ 3.4                           | 36.02 $\pm$ 1.6                                  | 26.375 $\pm$ 2.9                                         |
|           | H+26   | Mean $\pm$ SD | 16.7 $\pm$ 2.5                        | 12.7 $\pm$ 1.4                             | 13.7 $\pm$ 3.1                                   | 12.07 $\pm$ 2.6                                          |
|           | RIL    | Mean $\pm$ SD | 34.17 $\pm$ 2.85                      | 30.05 $\pm$ 3.33                           | 30.31 $\pm$ 3.11                                 | 24.75 $\pm$ 2.46                                         |
|           |        | Range         | 25.32 - 41.32                         | 21.08 - 38.19                              | 21.65 - 38.58                                    | 19.41 - 31.55                                            |
| DM (days) | HUW234 | Mean $\pm$ SD | 112.66 $\pm$ 2.6                      | 107.16 $\pm$ 3.2                           | 105.66 $\pm$ 2.65                                | 99.5 $\pm$ 3.7                                           |
|           | H+26   | Mean $\pm$ SD | 132 $\pm$ 1.2                         | 123 $\pm$ 3.7                              | 122 $\pm$ 2.32                                   | 120 $\pm$ 4.2                                            |
|           | RIL    | Mean $\pm$ SD | 115.2 $\pm$ 1.19                      | 107.32 $\pm$ 4.06                          | 106.12 $\pm$ 1.22                                | 103.76 $\pm$ 3.57                                        |
|           |        | Range         | 111.83 - 118.17                       | 96.67 - 117.67                             | 103.17 - 109.17                                  | 94.5 - 112.83                                            |
| CT (°C)   | HUW234 | Mean $\pm$ SD | 22.18 $\pm$ 1.1                       | 26.66 $\pm$ 0.89                           | 30.52 $\pm$ 0.83                                 | 31.72 $\pm$ 0.91                                         |
|           | H+26   | Mean $\pm$ SD | 20.34 $\pm$ 0.79                      | 23.34 $\pm$ 1.2                            | 24.34 $\pm$ 0.9                                  | 26.04 $\pm$ 1.1                                          |
|           | RIL    | Mean $\pm$ SD | 23.11 $\pm$ 0.81                      | 25.73 $\pm$ 0.95                           | 30.23 $\pm$ 1.01                                 | 31.75 $\pm$ 0.8                                          |
|           |        | Range         | 21.09 - 25.58                         | 23.37 - 28.3                               | 26.78 - 34.85                                    | 28.99 - 34.12                                            |
| NDVI      | HUW234 | Mean $\pm$ SD | 0.60 $\pm$ 0.06                       | 0.37 $\pm$ 0.09                            | 0.41 $\pm$ 0.06                                  | 0.29 $\pm$ 0.1                                           |
|           | H+26   | Mean $\pm$ SD | 0.67 $\pm$ 0.037                      | 0.67 $\pm$ 0.1                             | 0.61 $\pm$ 0.82                                  | 0.59 $\pm$ 0.05                                          |
|           | RIL    | Mean $\pm$ SD | 0.63 $\pm$ 0.04                       | 0.51 $\pm$ 0.04                            | 0.42 $\pm$ 0.04                                  | 0.31 $\pm$ 0.03                                          |
|           |        | Range         | 0.52 - 0.72                           | 0.39 - 0.59                                | 0.33 - 0.54                                      | 0.24 - 0.41                                              |
| SPAD      | HUW234 | Mean $\pm$ SD | 49.88 $\pm$ 3.22                      | 34.725 $\pm$ 4.23                          | 46.84 $\pm$ 4.41                                 | 28.01 $\pm$ 3.82                                         |
|           | H+26   | Mean $\pm$ SD | 64.95 $\pm$ 4.11                      | 64.95 $\pm$ 3.98                           | 60.95 $\pm$ 3.94                                 | 60.05 $\pm$ 2.47                                         |
|           | RIL    | Mean $\pm$ SD | 48.66 $\pm$ 2.4                       | 43.43 $\pm$ 3.25                           | 48.63 $\pm$ 3.99                                 | 36.04 $\pm$ 2.43                                         |
|           |        | Range         | 40.35 - 53.53                         | 34.18 - 50.46                              | 31.74 - 58.77                                    | 26.1 - 43.34                                             |
| AUDPC     | HUW234 | Mean $\pm$ SD | 286.73 $\pm$ 68.62                    | 765.30 $\pm$ 52.98                         | 292.75 $\pm$ 102.39                              | 904.87 $\pm$ 119.23                                      |
|           | H+26   | Mean $\pm$ SD | 142.84 $\pm$ 22.39                    | 230.84 $\pm$ 44.23                         | 189.84 $\pm$ 91.35                               | 255.84 $\pm$ 102.92                                      |
|           | RIL    | Mean $\pm$ SD | 304.51 $\pm$ 53.27                    | 504.69 $\pm$ 71.97                         | 438.13 $\pm$ 80.42                               | 731.14 $\pm$ 127.64                                      |

|                                        |        |               |                  |                  |                  |                  |
|----------------------------------------|--------|---------------|------------------|------------------|------------------|------------------|
|                                        |        | Range         | 187.66 - 431.4   | 299.31 - 689.35  | 210.77 - 598.79  | 384.88 - 1022    |
| <b>Grain area<br/>(mm<sup>2</sup>)</b> | HUW234 | Mean $\pm$ SD | 12.17 $\pm$ 0.10 | 11.91 $\pm$ 0.23 | 11.95 $\pm$ 0.54 | 7.91 $\pm$ 0.29  |
|                                        | H+26   | Mean $\pm$ SD | 14.87 $\pm$ 0.19 | 13.87 $\pm$ 0.36 | 13.87 $\pm$ 0.61 | 11.87 $\pm$ 0.41 |
|                                        | RIL    | Mean $\pm$ SD | 11.57 $\pm$ 0.56 | 11.58 $\pm$ 0.47 | 10.34 $\pm$ 0.66 | 7.84 $\pm$ 0.53  |
|                                        |        | Range         | 9.8 - 12.85      | 10.21 - 13       | 8.47 - 12.3      | 6.8 - 9.65       |
| <b>Grain<br/>perimeter<br/>(mm)</b>    | HUW234 | Mean $\pm$ SD | 17.16 $\pm$ 0.31 | 14.74 $\pm$ 0.13 | 17.04 $\pm$ 0.55 | 12.41 $\pm$ 0.26 |
|                                        | H+26   | Mean $\pm$ SD | 17.84 $\pm$ 0.81 | 17.84 $\pm$ 0.23 | 17.44 $\pm$ 0.91 | 14.84 $\pm$ 0.46 |
|                                        | RIL    | Mean $\pm$ SD | 16.71 $\pm$ 0.59 | 16.54 $\pm$ 0.43 | 16.62 $\pm$ 1.21 | 14.15 $\pm$ 0.78 |
|                                        |        | Range         | 15.06 - 19.5     | 15.2 - 17.78     | 15.06 - 19.50    | 12.45 - 18.04    |

**Table S2: Correlation coefficients between different nine phenotypic traits using pooled different sowing dates and treatment**

|              | <u>DH</u> | <u>TGW</u> | <u>DM</u> | <u>CT</u> | <u>NDVI</u> | <u>SPAD</u> | <u>AUDPC</u> | <u>area mm</u> | <u>perimeter mm</u> |
|--------------|-----------|------------|-----------|-----------|-------------|-------------|--------------|----------------|---------------------|
| DH           | 1         | 0.330*     | 0.546*    | - 0.734*  | 0.725*      | 0.237*      | - 0.395*     | 0.243*         | 0.127*              |
| TGW          | 0.330*    | 1          | 0.389*    | - 0.403*  | 0.452*      | 0.388*      | - 0.504*     | 0.528*         | 0.452*              |
| DM           | 0.546*    | 0.389*     | 1         | - 0.509*  | 0.62*       | 0.304*      | - 0.561*     | 0.268*         | 0.209*              |
| CT           | - 0.734*  | - 0.403*   | - 0.509*  | 1         | - 0.510*    | - 0.268*    | 0.362*       | - 0.292*       | - 0.194*            |
| NDVI         | 0.725*    | 0.452*     | 0.62*     | - 0.510*  | 1           | 0.467*      | - 0.555*     | 0.181*         | 0.086*              |
| SPAD         | 0.237*    | 0.388*     | 0.304*    | - 0.268*  | 0.467*      | 1           | - 0.451*     | 0.173*         | 0.085*              |
| AUDPC        | - 0.395*  | - 0.504*   | - 0.561*  | 0.362*    | - 0.555*    | - 0.451*    | 1            | - 0.440*       | - 0.400*            |
| area mm      | 0.243*    | 0.528*     | 0.268*    | - 0.292*  | 0.181*      | 0.173*      | - 0.440*     | 1              | 0.954*              |
| perimeter mm | 0.127*    | 0.452*     | 0.209*    | - 0.194*  | 0.086*      | 0.085*      | - 0.400*     | 0.954*         | 1                   |

\* significant at  $p < 0.0001$  DH: Days to heading, TKW: Thousand Kernel weight DM: Days to Maturity, CT: Canopy Temperature, NDVI: Normalized Distributed Vegetative Index, AUDPC: Area Under Disease Progress Curve, SPAD: Soil Plant Analysis Development

**Table S3: Summary of number, minor allele frequency (MAF) and density of single nucleotide polymorphism (SNP) markers used**

|             | Chromosomes | No. of markers | Chromosome length (Mb) | Minor allele frequency | Average distance between SNPs (kb) |
|-------------|-------------|----------------|------------------------|------------------------|------------------------------------|
| Genome A    | 1           | 339            | 594.10                 | 0.2219                 | 1753                               |
|             | 2           | 437            | 780.80                 | 0.2369                 | 1787                               |
|             | 3           | 384            | 750.84                 | 0.1993                 | 1955                               |
|             | 4           | 260            | 744.59                 | 0.2381                 | 2864                               |
|             | 5           | 358            | 709.77                 | 0.2128                 | 1983                               |
|             | 6           | 329            | 618.08                 | 0.2517                 | 1879                               |
|             | 7           | 517            | 736.71                 | 0.2290                 | 1425                               |
| Total (1-7) |             | <b>2624</b>    |                        |                        |                                    |
| Genome B    | 1           | 517            | 689.85                 | 0.1919                 | 1334                               |
|             | 2           | 493            | 801.26                 | 0.2129                 | 1625                               |
|             | 3           | 458            | 830.83                 | 0.2529                 | 1814                               |
|             | 4           | 140            | 673.62                 | 0.1297                 | 4812                               |
|             | 5           | 392            | 713.15                 | 0.2114                 | 1819                               |
|             | 6           | 393            | 720.99                 | 0.2617                 | 1835                               |
|             | 7           | 448            | 750.62                 | 0.2341                 | 1675                               |
| Total (1-7) |             | <b>2841</b>    |                        |                        |                                    |
| Genome D    | 1           | 145            | 495.45                 | 0.234696               | 3417                               |
|             | 2           | 177            | 651.85                 | 0.1722                 | 3683                               |
|             | 3           | 151            | 615.55                 | 0.1961                 | 4077                               |
|             | 4           | 58             | 509.86                 | 0.1655                 | 8791                               |
|             | 5           | 115            | 566.08                 | 0.1392                 | 4922                               |
|             | 6           | 116            | 473.59                 | 0.2060                 | 4083                               |
|             | 7           | 142            | 638.69                 | 0.2076                 | 4498                               |
| Total (1-7) |             | <b>904</b>     |                        |                        |                                    |

**Table S4: The Evanno table output at different values of K**

| K | Reps | Mean LnP (K) | Stdev LnP (K) | Ln'(K)     | Ln''(K)  | Delta K |
|---|------|--------------|---------------|------------|----------|---------|
| 2 | 3    | - 857197.66  | 43.97         | —          | —        | —       |
| 3 | 3    | - 788450.66  | 147.03        | 68747.00   | 49710.13 | 338.09  |
| 4 | 3    | - 769413.80  | 2254.68       | 19036.86   | 8176.73  | 3.62    |
| 5 | 3    | - 758553.66  | 3202.42       | 10860.13   | 41646.70 | 13.00   |
| 6 | 3    | - 789340.23  | 80238.60      | - 30786.56 | 80990.03 | 1.00    |
| 7 | 3    | - 739136.76  | 11369.24      | 50203.46   | —        | —       |

**Table S5: Linkage disequilibrium (LD) for the whole, A, B, and D genomes of wheat**

| Dataset      | No. of markers | Total marker pairs | Mean of r <sup>2</sup> for all pairs | Total unlinked pairs | Significant Pairs |                              |                                 |
|--------------|----------------|--------------------|--------------------------------------|----------------------|-------------------|------------------------------|---------------------------------|
|              |                |                    |                                      |                      | Total (P<0.001)   | Linked (r <sup>2</sup> >0.1) | Un linked (r <sup>2</sup> <0.1) |
| Whole genome | 2639           | 129275             | 0.435                                | 81786                | 32221             | 23996                        | 81786                           |
| A            | 1120           | 54725              | 0.0627                               | 38906                | 20520             | 9895                         | 38906                           |
| B            | 1097           | 53575              | 0.1827                               | 24854                | 23718             | 22368                        | 24854                           |
| D            | 422            | 19825              | 0.1030                               | 6910                 | 4313              | 3792                         | 6910                            |

**Table S6: SNPs associated with spot blotch resistance identified through GWAS in the 185 RILs from the cross of *Triticum aestivum* (HUW 234) and *T. spelta* (H+26)**

| Trait                   | SNP         | Chromosome | Position | p-value  | Minor Allele frequency (MAF) | r <sup>2</sup> | marker effect |
|-------------------------|-------------|------------|----------|----------|------------------------------|----------------|---------------|
| Days to heading (Days)  | 1125940 F 0 | 1A         | 3495     | 8.20E-16 | 0.00535                      | 0.4503         | -0.1443       |
|                         | 1395486 F 0 | 1B         | 3286     | 8.20E-16 | 0.00535                      | 0.4503         | -0.5206       |
|                         | 2256281 F 0 | 3A         | 3303     | 8.20E-16 | 0.00535                      | 0.4503         | 0.01125       |
|                         | 980238 F 0  | 3A         | 3508     | 8.20E-16 | 0.00535                      | 0.4503         | -0.5919       |
|                         | 1050819 F 0 | 4D         | 3482     | 8.20E-16 | 0.00535                      | 0.4503         | 0.75167       |
|                         | 1029559 F 0 | 5B         | 3274     | 8.20E-16 | 0.00535                      | 0.4503         | 0.61398       |
|                         | 1020582 F 0 | 5B         | 3486     | 8.20E-16 | 0.00535                      | 0.4503         | 0.32027       |
|                         | 1126383 F 0 | 5B         | 6315     | 8.20E-16 | 0.00535                      | 0.4503         | -0.3855       |
|                         | 987983 F 0  | 5D         | 3530     | 8.20E-16 | 0.00535                      | 0.4503         | -0.3756       |
|                         | 2266275 F 0 | 6B         | 3267     | 8.20E-16 | 0.00535                      | 0.4503         | -0.2655       |
|                         | 2278379 F 0 | 7B         | 4429     | 8.20E-16 | 0.00535                      | 0.4503         | -0.1621       |
|                         | 1077356 F 0 | 2A         | 3516     | 1.60E-10 | 0.0107                       | 0.28753        | -0.3125       |
|                         | 983670 F 0  | 3A         | 3509     | 1.60E-10 | 0.0107                       | 0.28753        | -0.0778       |
|                         | 976829 F 0  | 3B         | 3484     | 1.60E-10 | 0.0107                       | 0.28753        | 0.4934        |
|                         | 987210 F 0  | 6B         | 3574     | 1.60E-10 | 0.0107                       | 0.28753        | 0.15896       |
|                         | 1021511 F 0 | 7A         | 4329     | 1.60E-10 | 0.0107                       | 0.28753        | -0.2651       |
|                         | 2275693 F 0 | 3A         | 3308     | 2.80E-10 | 0.5                          | 0.28079        | -0.3652       |
| Days to maturity (Days) | 1125940 F 0 | 1A         | 3495     | 1.00E-16 | 0.00535                      | 0.48812        | -0.0619       |
|                         | 1395486 F 0 | 1B         | 3286     | 1.00E-16 | 0.00535                      | 0.48812        | -0.2886       |
|                         | 2256281 F 0 | 3A         | 3303     | 1.00E-16 | 0.00535                      | 0.48812        | 0.13197       |
|                         | 980238 F 0  | 3A         | 3508     | 1.00E-16 | 0.00535                      | 0.48812        | -0.4385       |
|                         | 1050819 F 0 | 4D         | 3482     | 1.00E-16 | 0.00535                      | 0.48812        | 0.30905       |
|                         | 1029559 F 0 | 5B         | 3274     | 1.00E-16 | 0.00535                      | 0.48812        | 0.3297        |
|                         | 1020582 F 0 | 5B         | 3486     | 1.00E-16 | 0.00535                      | 0.48812        | 0.15955       |
|                         | 1126383 F 0 | 5B         | 6315     | 1.00E-16 | 0.00535                      | 0.48812        | -0.39         |
|                         | 987983 F 0  | 5D         | 3530     | 1.00E-16 | 0.00535                      | 0.48812        | -0.1065       |

|                         |             |             |      |          |          |         |         |
|-------------------------|-------------|-------------|------|----------|----------|---------|---------|
|                         | 2266275 F 0 | 6B          | 3267 | 1.00E-16 | 0.00535  | 0.48812 | -0.0225 |
|                         | 2278379 F 0 | 7B          | 4429 | 1.00E-16 | 0.00535  | 0.48812 | -0.2085 |
|                         | 1077356 F 0 | 2A          | 3516 | 3.90E-11 | 0.0107   | 0.31577 | -0.1509 |
|                         | 983670 F 0  | 3A          | 3509 | 3.90E-11 | 0.0107   | 0.31577 | -0.0931 |
|                         | 976829 F 0  | 3B          | 3484 | 3.90E-11 | 0.0107   | 0.31577 | 0.08726 |
|                         | 987210 F 0  | 6B          | 3574 | 3.90E-11 | 0.0107   | 0.31577 | 0.02065 |
|                         | 1021511 F 0 | 7A          | 4329 | 3.90E-11 | 0.0107   | 0.31577 | -0.1036 |
|                         | 2275693 F 0 | 3A          | 3308 | 2.50E-10 | 0.5      | 0.29282 | -0.0244 |
|                         | AUDPC       | 3064429 F 0 | 5B   | 2883     | 0.00044  | 0.49733 | 0.05298 |
| 1088945 F 0             |             | 3D          | 3278 | 0.00096  | 0.5      | 0.04461 | 0.27412 |
| 2281188 F 0             |             | 2A          | 5634 | 0.00132  | 0.4492   | 0.04121 | 3.1096  |
| 3028841 F 0             |             | 2D          | 3906 | 0.00141  | 0.5      | 0.04047 | -1.1446 |
| 1039495 F 0             |             | 2A          | 2161 | 0.00154  | 0.4492   | 0.03954 | -8.8813 |
| Canopy Temperature (°C) | 1034888 F 0 | 4A          | 3281 | 0.00037  | 0.5      | 0.07074 | -0.0197 |
|                         | 1125940 F 0 | 1A          | 3495 | 0.00113  | 0.00535  | 0.05884 | -0.0072 |
|                         | 1395486 F 0 | 1B          | 3286 | 0.00113  | 0.00535  | 0.05884 | -0.1396 |
|                         | 2256281 F 0 | 3A          | 3303 | 0.00113  | 0.00535  | 0.05884 | -0.0537 |
|                         | 980238 F 0  | 3A          | 3508 | 0.00113  | 0.00535  | 0.05884 | 0.05024 |
| NDVI                    | 1029767 F 0 | 5A          | 6013 | 0.00028  | 0.32888  | 0.07355 | 0.00156 |
|                         | 2253029 F 0 | 2A          | 3116 | 0.00047  | 0.5      | 0.06813 | -0.0045 |
|                         | 995480 F 0  | 6B          | 3454 | 0.00049  | 0.13102  | 0.0676  | -0.0039 |
|                         | 1079395 F 0 | 7B          | 2832 | 0.00058  | 0.01604  | 0.0658  | 0.00476 |
|                         | 3064380 F 0 | 5A          | 4170 | 0.0007   | 0.12299  | 0.06392 | -0.0024 |
|                         | 3064765 F 0 | 1B          | 928  | 0.00077  | 0.34225  | 0.06292 | -0.0024 |
|                         | 1045022 F 0 | 5A          | 2928 | 0.00088  | 0.02139  | 0.06143 | -0.0033 |
|                         | 1058939 F 0 | 1A          | 6063 | 0.00096  | 0.36364  | 0.0605  | -0.0005 |
|                         | 1102573 F 0 | 1A          | 3376 | 0.00128  | 0.01337  | 0.05751 | 0.00978 |
|                         | SPAD        | 1125940 F 0 | 1A   | 3495     | 7.00E-07 | 0.00535 | 0.1764  |
| 1395486 F 0             |             | 1B          | 3286 | 7.00E-07 | 0.00535  | 0.1764  | -0.0305 |
| 2256281 F 0             |             | 3A          | 3303 | 7.00E-07 | 0.00535  | 0.1764  | -0.0626 |

|                      |             |    |      |          |         |         |         |
|----------------------|-------------|----|------|----------|---------|---------|---------|
|                      | 980238 F 0  | 3A | 3508 | 7.00E-07 | 0.00535 | 0.1764  | -0.089  |
|                      | 1050819 F 0 | 4D | 3482 | 7.00E-07 | 0.00535 | 0.1764  | 0.45443 |
|                      | 1029559 F 0 | 5B | 3274 | 7.00E-07 | 0.00535 | 0.1764  | 0.33204 |
|                      | 1020582 F 0 | 5B | 3486 | 7.00E-07 | 0.00535 | 0.1764  | 0.78679 |
|                      | 1126383 F 0 | 5B | 6315 | 7.00E-07 | 0.00535 | 0.1764  | -0.3109 |
|                      | 987983 F 0  | 5D | 3530 | 7.00E-07 | 0.00535 | 0.1764  | -0.181  |
|                      | 2275693 F 0 | 3A | 3308 | 1.10E-06 | 0.5     | 0.15883 | -0.2261 |
| Test Weight (g)      | 1125940 F 0 | 1A | 3495 | 1.20E-06 | 0.00535 | 0.15753 | 0.18797 |
|                      | 1395486 F 0 | 1B | 3286 | 1.20E-06 | 0.00535 | 0.15753 | 0.1447  |
|                      | 2256281 F 0 | 3A | 3303 | 1.20E-06 | 0.00535 | 0.15753 | -0.1669 |
|                      | 980238 F 0  | 3A | 3508 | 1.20E-06 | 0.00535 | 0.15753 | 0.14922 |
|                      | 1050819 F 0 | 4D | 3482 | 1.20E-06 | 0.00535 | 0.15753 | -0.2597 |
|                      | 1029559 F 0 | 5B | 3274 | 1.20E-06 | 0.00535 | 0.15753 | -1.2436 |
|                      | 1020582 F 0 | 5B | 3486 | 1.20E-06 | 0.00535 | 0.15753 | -0.5015 |
| Grain Area (mm2)     | 1126383 F 0 | 5B | 6315 | 1.20E-06 | 0.00535 | 0.15753 | 0.30098 |
|                      | 1125940 F 0 | 1A | 3495 | 9.10E-07 | 0.00535 | 0.14877 | 0.13395 |
|                      | 1395486 F 0 | 1B | 3286 | 9.10E-07 | 0.00535 | 0.14877 | 0.01283 |
|                      | 2256281 F 0 | 3A | 3303 | 9.10E-07 | 0.00535 | 0.14877 | 0.04926 |
|                      | 980238 F 0  | 3A | 3508 | 9.10E-07 | 0.00535 | 0.14877 | -0.0595 |
|                      | 1050819 F 0 | 4D | 3482 | 9.10E-07 | 0.00535 | 0.14877 | -0.0004 |
|                      | 1029559 F 0 | 5B | 3274 | 9.10E-07 | 0.00535 | 0.14877 | 0.02607 |
|                      | 1020582 F 0 | 5B | 3486 | 9.10E-07 | 0.00535 | 0.14877 | 0.05289 |
|                      | 1126383 F 0 | 5B | 6315 | 9.10E-07 | 0.00535 | 0.14877 | 0.01694 |
|                      | 987983 F 0  | 5D | 3530 | 9.10E-07 | 0.00535 | 0.14877 | -0.042  |
|                      | 2280866 F 0 | 7A | 6264 | 3.10E-05 | 0.00535 | 0.14654 | 0.05318 |
|                      | 3064641 F 0 | 3A | 3335 | 4.90E-05 | 0.04545 | 0.14156 | 0.0421  |
|                      | 1241625 F 0 | 1B | 5206 | 0.00017  | 0.13369 | 0.12841 | 0.28392 |
|                      | 1019339 F 0 | 2D | 169  | 0.00028  | 0.33155 | 0.12341 | -0.02   |
| Grain Perimeter (mm) | 1088359 F 0 | 5A | 3195 | 0.0004   | 0.05882 | 0.1197  | -0.0146 |
